# Supplementary material for: Disordered metasurface enabled single-shot full-Stokes polarization imaging leveraging weak dichroism
Source: PubMed Central journal article supplement (PMC10630513; doi:10.1038/s41467-023-42944-6), 2023-11-07
Supplement: 41467_2023_42944_MOESM2_ESM.pdf [file 41467_2023_42944_MOESM2_ESM.pdf]

## **Description of Additional Supplementary Files:**

**Supplementary Movie 1:** The supplementary movie S1 shows the real-time polarization imaging of a dynamic scene where a rotating filter wheel with six sheets of film polarizer whose axes are arranged radially outward.
